# Supplementary material for: Tracing Worldwide Turkey Genetic Diversity Using D-loop Sequence Mitochondrial DNA Analysis
Source: MDPI journal article supplement (doi:10.3390/ani9110897), 2019-11-01

- 1 **Figure S1.** Median-joining haplotype network. The relationships between haplotypes
- 2 identified in domesticated *M. gallopavo*, including 293 individuals, commercial lines'
- 3 and arqueological samples; and 31 haplotypes are shown.

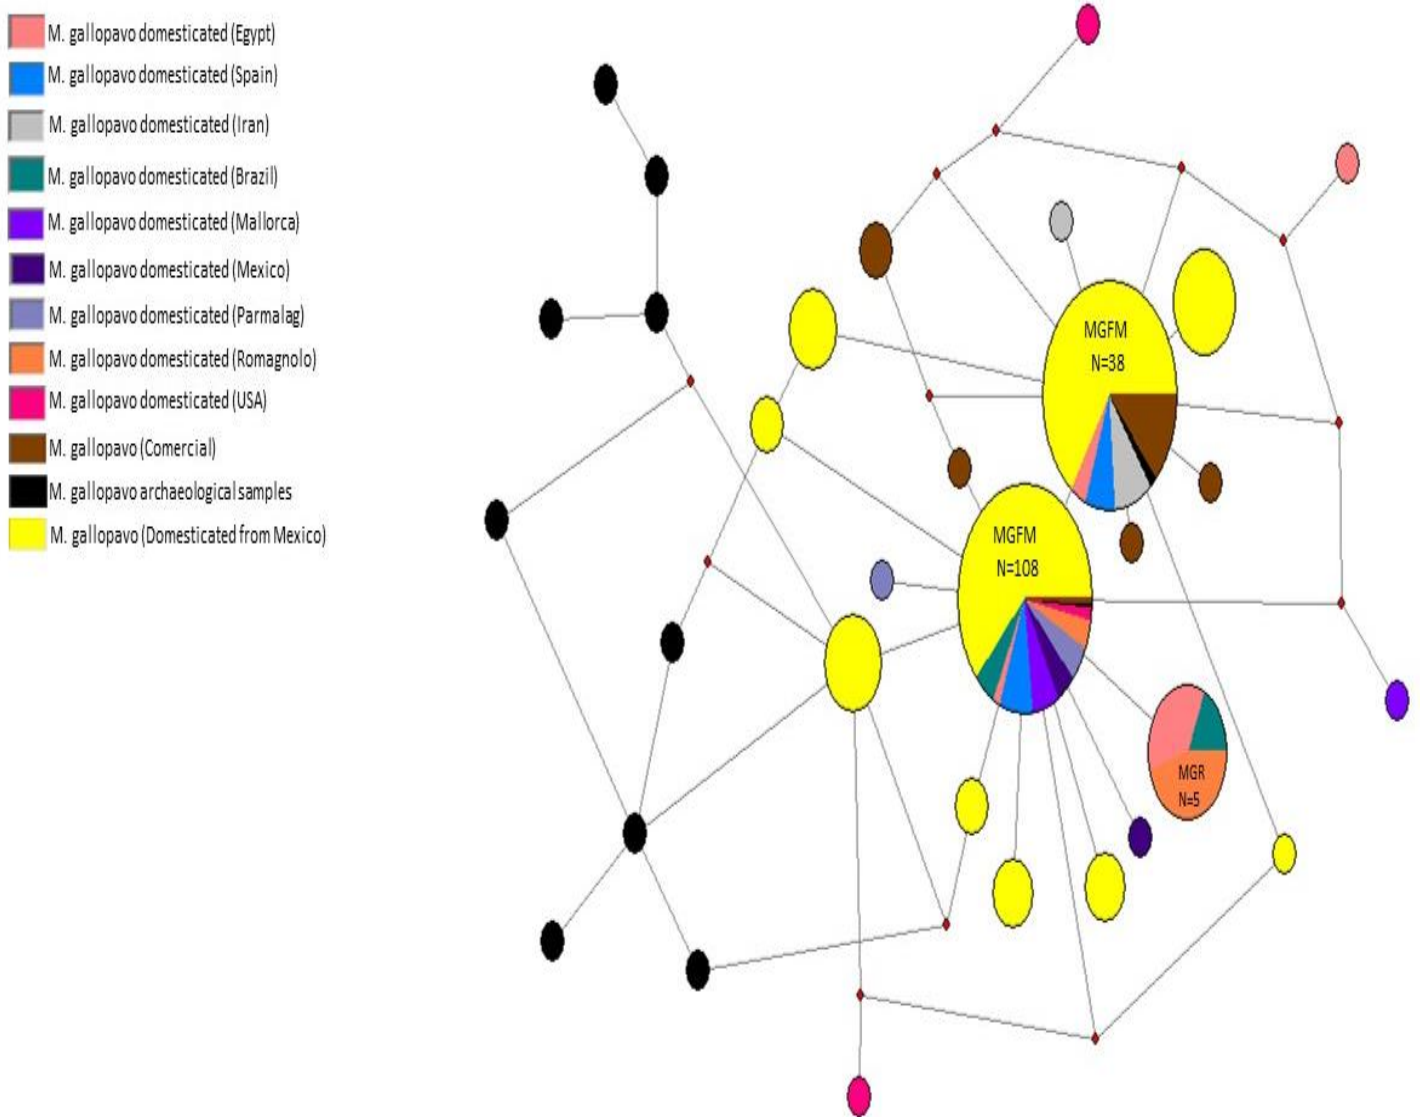

Supplement: s1 [file s1]
